# Supplementary material
Source: PubMed Central journal article supplement (PMC4988917)

## SUPPLEMENTAL MATERIAL

**Supplemental Table 1. Sample quality control metrics and exclusions.**

| Statistic              | Q1*   | Mean   | Q3*   | Lower<br>Bound† | Upper<br>Bound† | Broad  | UW     | Baylor |
|------------------------|-------|--------|-------|-----------------|-----------------|--------|--------|--------|
| Samples jointly called |       |        |       |                 |                 | 2317   | 481    | 475    |
| Total # of variants    | 19289 | 19480  | 19696 | 18068           | 20917           | 16     | 2      | 1      |
| # Singletons           | 56    | 94.54  | 135   | 0               | 372             | 1      | 0      | 0      |
| # Doubletons           | 54    | 65.583 | 77    | 0               | 146             | 6      | 2      | 2      |
| TiTv                   | 3.22  | 3.252  | 3.282 | 3.034           | 3.468           | 0      | 0      | 0      |
| Het/Hom                | 5.912 | 6.215  | 6.538 | 4.031           | 8.419           | 12     | 3      | 1      |
| Missingness            | 0.014 | 0.022  | 0.028 | 0               | 0.069           | 6      | 2      | 1      |
| Poor concordance       |       |        |       |                 |                 | 10     | 0      | 1      |
| Total Excluded (%)     |       |        |       |                 |                 | 36     | 7      | 7      |
|                        |       |        |       |                 |                 | (1.6%) | (1.5%) | (1.5%) |
| Total Remaining        |       |        |       |                 |                 | 2281   | 474    | 468    |

\* Q1 and Q3 refer to the 1<sup>st</sup> and 3<sup>rd</sup> quartiles, respectively

† Lower and Upper Bounds are the bounds used for excluding outlier individuals (> ± 3 x interquartile range)

**Supplemental Table 2. Variant descriptive statistics.**

Sites were limited to those labeled as VQSR PASS and quality depth (QD)  $\geq 2$ .

| <b># of variant sites</b>      | <b>MAF* &lt; 5%</b> | <b>MAF <math>\geq</math> 5%</b> |
|--------------------------------|---------------------|---------------------------------|
| Total                          | 729,666             | 55,015                          |
| Nonsense                       | 7,791               | 128                             |
| Frameshift                     | 6,574               | 285                             |
| Splice-site                    | 2,898               | 59                              |
| Damaging missense <sup>†</sup> | 49,929              | 343                             |
| Non-damaging missense          | 354,017             | 21,701                          |
| Non-protein altering           | 308,457             | 32,499                          |

\* MAF, minor allele frequency.

<sup>†</sup> Damaging missense variants were classified according to the following 7 in silico prediction algorithms: LRT, Mutation Taster, PolyPhen2 (HumDiv), PolyPhen2 (HumVar), SIFT, MutationAssessor and FATHMM

**Supplemental Table 3. All gene-based association results reaching a significance level of  $1.1 \times 10^{-7}$ .**

| Outcome                                       | Gene          | Set of variants*   | #<br>variants <sup>†</sup> | #<br>Carriers <sup>‡</sup> | Beta±SE   | P-value                |
|-----------------------------------------------|---------------|--------------------|----------------------------|----------------------------|-----------|------------------------|
| LDL-C<br>(mg/dl)                              | <i>PCSK9</i>  | Null               | 3                          | 72                         | -44.1±4.7 | 1.61x10 <sup>-20</sup> |
|                                               | <i>PCSK9</i>  | Null+≥7/7 damaging | 3                          | 72                         | -44.1±4.7 | 1.61x10 <sup>-20</sup> |
|                                               | <i>PCSK9</i>  | Null+≥6/7 damaging | 7                          | 116                        | -35.8±3.8 | 2.86x10 <sup>-21</sup> |
|                                               | <i>PCSK9</i>  | Null+≥5/7 damaging | 10                         | 156                        | -27.0±3.3 | 2.49x10 <sup>-16</sup> |
| Total cholesterol<br>(mg/dl)                  | <i>PCSK9</i>  | Null               | 2                          | 60                         | -38.6±5.6 | 6.55x10 <sup>-12</sup> |
|                                               | <i>PCSK9</i>  | Null+≥7/7 damaging | 2                          | 60                         | -38.6±5.6 | 6.55x10 <sup>-12</sup> |
|                                               | <i>PCSK9</i>  | Null+≥6/7 damaging | 6                          | 94                         | -30.3±4.5 | 2.52x10 <sup>-11</sup> |
|                                               | <i>PCSK9</i>  | Null+≥5/7 damaging | 9                          | 126                        | -22.8±3.9 | 7.35x10 <sup>-9</sup>  |
| MCH (pg)                                      | <i>HBQ1</i>   | Null+≥6/7 damaging | 1                          | 85                         | -2.0±0.3  | 8.44x10 <sup>-13</sup> |
|                                               | <i>HBQ1</i>   | Null+≥5/7 damaging | 1                          | 85                         | -2.0±0.3  | 8.44x10 <sup>-13</sup> |
| MCV (fL)                                      | <i>HBQ1</i>   | Null+≥6/7 damaging | 1                          | 85                         | -4.9±0.7  | 4.40x10 <sup>-12</sup> |
|                                               | <i>HBQ1</i>   | Null+≥5/7 damaging | 1                          | 85                         | -4.9±0.7  | 4.40x10 <sup>-12</sup> |
| Red blood cell<br>distribution width<br>[RDW] | <i>VPS13A</i> | Null+≥5/7 damaging | 9                          | 34                         | 1.3±0.2   | 7.13x10 <sup>-8</sup>  |

\* Null variants are defined as nonsense, splice-site, and frameshift variants. Damaging

missense variants were classified according to the following 7 in silico prediction algorithms:

LRT, Mutation Taster, PolyPhen2 (HumDiv), PolyPhen2 (HumVar), SIFT, MutationAssessor and FATHMM.

<sup>†</sup> # variant sites, number of sites going into the gene-based test

<sup>‡</sup> # Carriers, number of individuals carrying a null or damaging missense variant tested

**Supplemental Table 4. Single variant results contributing into the gene-based tests**

reaching a significance level of  $1.1 \times 10^{-7}$ .

Single variant regression results not reported for variants with less than 3 carriers.

| Trait            | Gene   | chr:pos_REF_ALT*  | Protein Change       | N    | MAC | Call rate | MAF   | Beta±SE    | p-value             |
|------------------|--------|-------------------|----------------------|------|-----|-----------|-------|------------|---------------------|
| LDL-C<br>(mg/dl) | PCSK9  | 1:55512222_C/G    | p.Y142*              | 2950 | 12  | 1         | 0.20% | -51.4±11.4 | 5x10 <sup>-6</sup>  |
|                  |        | 1:55512262_T/C    | p.W156R              | 2950 | 1   | 1         | 0.02% |            |                     |
|                  |        | 1:55518064_G/A    | p.G213R              | 2950 | 1   | 1         | 0.02% |            |                     |
|                  |        | 1:55518419_G/A    | p.V252M              | 2945 | 2   | 1         | 0.03% |            |                     |
|                  |        | 1:55518422_C/T    | p.L253F              | 2945 | 40  | 1         | 0.68% | -21.6±6.4  | 8x10 <sup>-04</sup> |
|                  |        | 1:55527221_C/T    | p.Q619*              | 2680 | 1   | 0.91      | 0.02% |            |                     |
|                  |        | 1:55529215_C/A    | p.C679*              | 2928 | 62  | 0.99      | 1.06% | -43.2±5.1  | 7x10 <sup>-17</sup> |
| MCH<br>(pg)      | HBQ1   | 16:230724_G/C     | p.G52A               | 2103 | 88  | 0.75      | 2.09% | -1.8±0.3   | 7x10 <sup>-12</sup> |
| RDW<br>(%)       | VPS13A | 9:79792694_C/T    | p.S25F               | 2780 | 1   | 1         | 0.02% |            |                     |
|                  |        | 9:79816302_A/G    | p.K56E               | 2779 | 1   | 1         | 0.02% |            |                     |
|                  |        | 9:79852982_C/T    | p.L554F              | 2779 | 2   | 1         | 0.04% |            |                     |
|                  |        | 9:79867171_C/T    | p.R731*              | 2780 | 1   | 1         | 0.02% |            |                     |
|                  |        | 9:79917908_G/A    | p.R1297Q             | 2780 | 1   | 1         | 0.02% |            |                     |
|                  |        | 9:79959197_G/GTAA | p.E2385L<br>2386ins* | 2778 | 1   | 1         | 0.02% |            |                     |
|                  |        | 9:79973335_G/C    | p.K2672N             | 2780 | 22  | 1         | 0.40% | 1.0±0.3    | 9x10 <sup>-04</sup> |
|                  |        | 9:79973337_C/T    | p.S2673L             | 2780 | 4   | 1         | 0.07% | 5.0±0.7    | 5x10 <sup>-13</sup> |
|                  |        | 9:80022452_C/T    | p.R3135*             | 2777 | 1   | 1         | 0.02% |            |                     |

\* Chr:pos\_REF\_ALT is in hg19.

**Supplemental Table 5. Comparison of phenotypes for compound heterozygous null *PCSK9* carriers, heterozygous null *PCSK9* carriers, and non-carriers.**

Values reported as means for each category of *PCSK9* carrier status. Regression results (beta, SE, p-value) compare carriers of *PCSK9* null mutations (n=80) to non-carriers (n=3,143) adjusting for age and sex. Wilcoxon rank sum test compares the distribution of *PCSK9* compound nulls (n=3) to individuals carrying one null mutation in *PCSK9* (n=77).

| Trait                        | Non-carrier<br>(n=3143) | Frame shift<br>(n=1) | p.C679X<br>(n=64) | p.Q619X<br>(n=2) | p.Y142X<br>(n=10) | p.Y142X<br>&<br>p.Q679X<br>(n=3) | Beta±SE   | p-value               | Wilcoxon |
|------------------------------|-------------------------|----------------------|-------------------|------------------|-------------------|----------------------------------|-----------|-----------------------|----------|
|                              |                         |                      |                   |                  |                   |                                  |           |                       | p-value  |
| LDL-C (mg/dl)                | 132.9                   | --                   | 89.80             | 71               | 89.60             | 55.93                            | -44.7±4.6 | 2.5x10 <sup>-22</sup> | 0.04     |
| Total Cholesterol<br>(mg/dl) | 207.0                   | --                   | 170.64            | --               | 159.89            | 161.50                           | -38.4±5.5 | 4.2x10 <sup>-12</sup> | 0.73     |
| HDL-C (mg/dl)                | 51.5                    | --                   | 55.41             | 53               | 49.33             | 67.33                            | 3.8±1.7   | 0.02                  | 0.45     |
| MCH (pg)                     | 28.9                    | 31.8                 | 29.50             | 30.25            | 28.54             | 29.30                            | 0.6±0.3   | 0.05                  | 0.92     |
| MCV (fL)                     | 87.0                    | 94.3                 | 88.44             | 91.8             | 86.21             | 87.90                            | 1.4±0.8   | 0.06                  | 0.77     |
| QRS interval<br>(msec)       | 92.0                    | 94                   | 93.51             | 90               | 95.71             | 100.00                           | 1.9±1.1   | 0.09                  | 0.44     |
| DBP (mmHg)                   | 81.5                    | 80                   | 83.72             | 91.5             | 79.00             | 84.33                            | 1.9±1.2   | 0.11                  | 1        |

|                           |        |        |         |         |         |         |            |      |       |
|---------------------------|--------|--------|---------|---------|---------|---------|------------|------|-------|
| Adiponectin*<br>(ng/ml)   | 5360.4 | 2670.9 | 5082.54 | 3308.65 | 3511.22 | 3539.13 | -0.1±0.07  | 0.13 | 0.63  |
| Endothelin*<br>(pg/ml)    | 1.3    | 1      | 1.39    | 1.3     | 1.35    | 1.97    | 0.07±0.06  | 0.15 | 0.17  |
| RDW (%)                   | 13.7   | 12.8   | 13.41   | 14      | 13.91   | 13.63   | -0.2±0.2   | 0.15 | 0.70  |
| Renin* (ng/ml/hr)         | 1.7    | 1.7    | 0.42    | --      | 1.89    | 1.00    | -0.3±0.2   | 0.17 | 0.28  |
| MCHC (%)                  | 33.2   | 33.7   | 33.32   | 32.9    | 33.03   | 33.30   | 0.1±0.1    | 0.23 | 0.90  |
| Height (cm)               | 169.1  | 168    | 170.09  | 172     | 166.00  | 164.67  | 0.7±0.7    | 0.36 | 0.32  |
| hsCRP* (mg/dl)            | 0.5    | 2.7    | 0.55    | 0.4745  | 0.55    | 2.21    | 0.1±0.1    | 0.36 | 0.86  |
| Red cell count<br>(m/cmm) | 4.5    | 3.5    | 4.46    | 3.98    | 4.63    | 4.85    | -0.05±0.05 | 0.37 | 0.34  |
| Glucose (mg/dl)           | 90.6   | --     | 88.92   | 87      | 94.67   | 91.00   | -0.9±1.1   | 0.42 | 0.28  |
| SBP (mmHg)                | 132.1  | 134    | 133.42  | 146.5   | 131.70  | 134.00  | 1.6±2.0    | 0.44 | 0.79  |
| QT interval<br>(msec)     | 413.4  | 378    | 412.34  | 389     | 425.50  | 369.33  | -2.6±3.4   | 0.44 | 0.006 |
| Aldosterone*<br>(ng/dl)   | 5.8    | 1.9    | 6.23    | 2.4     | 6.42    | 4.03    | 0.06±0.08  | 0.47 | 0.50  |
| Hemoglobin                | 13.0   | 11.2   | 13.09   | 12.05   | 13.20   | 14.10   | 0.09±0.1   | 0.51 | 0.13  |

|                          |       |      |        |         |        |        |             |      |      |
|--------------------------|-------|------|--------|---------|--------|--------|-------------|------|------|
| (g/dl)                   |       |      |        |         |        |        |             |      |      |
| sCort (ug/dl)            | 9.9   | 5.3  | 9.49   | 11.2    | 10.20  | 9.07   | -0.3±0.5    | 0.55 | 0.99 |
| Hematocrit (%)           | 39.2  | 33.3 | 39.33  | 36.6    | 40.00  | 42.53  | 0.2±0.4     | 0.55 | 0.25 |
| Weight (kg)              | 91.3  | 74.7 | 94.53  | 79.7    | 87.97  | 80.13  | 1.3±2.4     | 0.58 | 0.32 |
| Leptin* (ng/ml)          | 28.4  | 19.6 | 30.03  | 19      | 23.22  | 27.33  | -0.03±0.08  | 0.69 | 0.90 |
| Insulin (IU/ml)          | 15.7  | --   | 16.60  | 7       | 14.00  | 12.50  | 0.3±1.1     | 0.77 | 0.68 |
| HOMA-B                   |       |      |        |         |        |        |             |      | 0.66 |
| (mmol/l)                 | 215.6 | --   | 232.40 | 107.146 | 170.66 | 170.25 | 3.9±13.6    | 0.78 |      |
| Waist (cm)               | 101.3 | 94   | 100.48 | 107.5   | 102.90 | 98.67  | -0.5±1.8    | 0.79 | 0.80 |
| Neck (cm)                | 38.7  | 36   | 38.80  | 36.5    | 39.40  | 36.67  | 0.09±0.4    | 0.81 | 0.23 |
| BMI (kg/m <sup>2</sup> ) | 31.9  | 26.5 | 32.17  | 27.84   | 32.11  | 29.56  | -0.1±0.8    | 0.89 | 0.55 |
| HOMA-IR                  |       |      |        |         |        |        |             |      | 0.79 |
| (mmol/l)                 | 3.6   | --   | 3.70   | 1.50    | 3.37   | 2.80   | 0.04±0.3    | 0.90 |      |
| Triglycerides*           |       |      |        |         |        |        |             |      | 0.85 |
| (mg/dl)                  | 107.4 | --   | 103.56 | 39      | 104.78 | 91.00  | -0.002±0.06 | 0.97 |      |
| HbA1c (%)                | 5.51  | --   | 5.47   | 5.9     | 5.74   | 5.40   | -0.001±0.06 | 0.98 | 0.77 |

\* Regression model output (beta, standard error, and p-value) are based on log(trait) as outcome due to skewed distributions of raw trait.

**Supplemental Table 6. Hematological trait association results for VPS13A.**

| <b>Outcome</b>                                   | <b>#</b>        |             |           |                        |
|--------------------------------------------------|-----------------|-------------|-----------|------------------------|
|                                                  | <b>Carriers</b> | <b>Beta</b> | <b>SE</b> | <b>P-value</b>         |
| Red blood cell distribution width (%)            | 34              | 1.30        | 0.24      | 7.13x10 <sup>-08</sup> |
| Hemoglobin (g/dl)                                | 37              | -0.72       | 0.21      | 6.98x10 <sup>-04</sup> |
| Mean corpuscular hemoglobin (pg)                 | 34              | -1.44       | 0.44      | 1.22x10 <sup>-03</sup> |
| Hematocrit level (%)                             | 37              | -1.85       | 0.59      | 1.86x10 <sup>-03</sup> |
| Mean corpuscular volume (fL)                     | 34              | -3.41       | 1.13      | 2.63x10 <sup>-03</sup> |
| Mean corpuscular hemoglobin concentration<br>(%) | 34              | -0.45       | 0.16      | 5.19x10 <sup>-03</sup> |
| Red cell count (m/cmm)                           | 34              | -0.09       | 0.08      | 0.25                   |



**Supplemental Table 7. Evidence of association in JHS data for genes reported in Li et al.**

We did not analyze lactate levels, reported in Li et al to be associated with *WDR62*. We did not find any carriers of rare loss of function variation in *PLEKHG1*, reported in Li et al to be associated with creatinine.

MAC (minor allele count), number of minor alleles across the variant sites; % Carriers, percent of individuals carrying a null or damaging missense variant tested; Beta, SE (standard error), p-value are from a regression model adjusting for age, sex, and PCs.

| Outcome                            | Gene            | Mutations                                                | MAC | % Carriers | Beta±SE   | P-value               |
|------------------------------------|-----------------|----------------------------------------------------------|-----|------------|-----------|-----------------------|
| Total Cholesterol<br>(mg/dl)       | <i>PCSK9</i>    | p.Y142*<br>p.Q619*                                       | 60  | 2.51%      | -38.6±5.6 | 6.6x10 <sup>-12</sup> |
| Log(triglycerides)<br>(log[mg/dl]) | <i>APOC3</i>    | p.R19*<br>c.55+1G>G<br>c.179+1G>T<br>p.W62*<br>p.T94Lfs* | 7   | 0.24%      | -0.9±0.2  | 1.0x10 <sup>-05</sup> |
| Fasting glucose* (mg/dl)           | <i>TXNDC5</i>   | p.T297Rfs*19                                             | 3   | 0.13%      | 9.4±5.2   | 0.07                  |
| Fasting glucose* (mg/dl)           | <i>GLIPR1L2</i> | p.E204Dfs*56                                             | 1   | 0.04%      | -3.3±8.6  | 0.70                  |
| Log(triglycerides)<br>(log[mg/dl]) | <i>TIGIT</i>    | p.Q139*                                                  | 1   | 0.03%      | -0.1±0.5  | 0.85                  |

\* The analysis of fasting glucose excluding individuals with type 2 diabetes.

**Supplemental Table 8. Results for Mendelian lipid genes.** Best Test indicates the group of variants that provided the most significant results for the gene. # variant sites, number of sites going into the gene-based test; MAC (minor allele count), number of minor alleles across the variant sites; % Carriers, percent of individuals carrying a null or damaging missense variant tested; Beta, SE (standard error), p-value for association.

| Outcome                 | Gene    | Test                  | Best Test       |     |            |            |                       | Null variants only |     |            |            |                       |
|-------------------------|---------|-----------------------|-----------------|-----|------------|------------|-----------------------|--------------------|-----|------------|------------|-----------------------|
|                         |         |                       | # variant sites | MAC | % Carriers | Beta±SE    | P-value               | # variant sites    | MAC | % Carriers | Beta±SE    | P-value               |
| LDL-C<br>(mg/dl)        | PCSK9   | Null+≥6/7<br>damaging | 7               | 116 | 3.9%       | -35.8±3.8  | 2.8x10 <sup>-21</sup> | 3                  | 72  | 2.4%       | -44.1±4.7  | 1.6x10 <sup>-20</sup> |
|                         | LDLR    | Null+≥7/7<br>damaging | 4               | 6   | 0.2%       | 63.9±15.7  | 4.7x10 <sup>-05</sup> |                    |     | NA         |            |                       |
|                         | LDLRAP1 | Null+≥5/7<br>damaging | 3               | 3   | 0.1%       | 58.8±21.9  | 0.007                 | 1                  | 1   | 0.0%       | 65.2±38.5  | 0.090                 |
|                         | ABCG5   | Null+≥7/7<br>damaging | 2               | 2   | 0.1%       | 50.5±26.4  | 0.056                 | 2                  | 2   | 0.1%       | 50.5±26.4  | 0.056                 |
|                         | MTTP    | Null+≥5/7<br>damaging | 3               | 4   | 0.1%       | -31.6±19.0 | 0.096                 | 1                  | 2   | 0.1%       | -33.8±27.2 | 0.215                 |
|                         | ABCG8   | Null+≥5/7<br>damaging | 12              | 141 | 4.8%       | -2.1±3.4   | 0.538                 | 2                  | 5   | 0.2%       | 4.7±17.2   | 0.787                 |
|                         | ANGPTL3 | Null+≥5/7<br>damaging | 6               | 15  | 0.5%       | -3.9±10.3  | 0.704                 | 4                  | 13  | 0.4%       | -1.5±11.2  | 0.895                 |
|                         | APOB    | Null+≥7/7<br>damaging | 1               | 1   |            | NA         |                       | 1                  | 1   |            | NA         |                       |
| HDL-C<br>(mg/dl)        | CETP    | Null+≥5/7<br>damaging | 3               | 7   | 0.2%       | 20.9±5.4   | 0.0001                | 3                  | 7   | 0.2%       | 20.9±5.4   | 0.0001                |
|                         | ABCA1   | Null+≥6/7<br>damaging | 13              | 15  | 0.5%       | -7.0±3.6   | 0.052                 | 4                  | 4   | 0.1%       | -9.6±6.9   | 0.166                 |
| Log(TG)<br>(log(mg/dl)) | LIPC    | Null+≥5/7<br>damaging | 17              | 43  | 1.4%       | 0.1±0.1    | 0.144                 | 3                  | 9   | 0.3%       | 0.03±0.2   | 0.880                 |
|                         | LPL     | Null+≥5/7<br>damaging | 2               | 2   | 0.1%       | 0.02±0.4   | 0.946                 |                    |     | NA         |            |                       |

**Supplemental Figure 1. Distribution of sample QC metrics.**

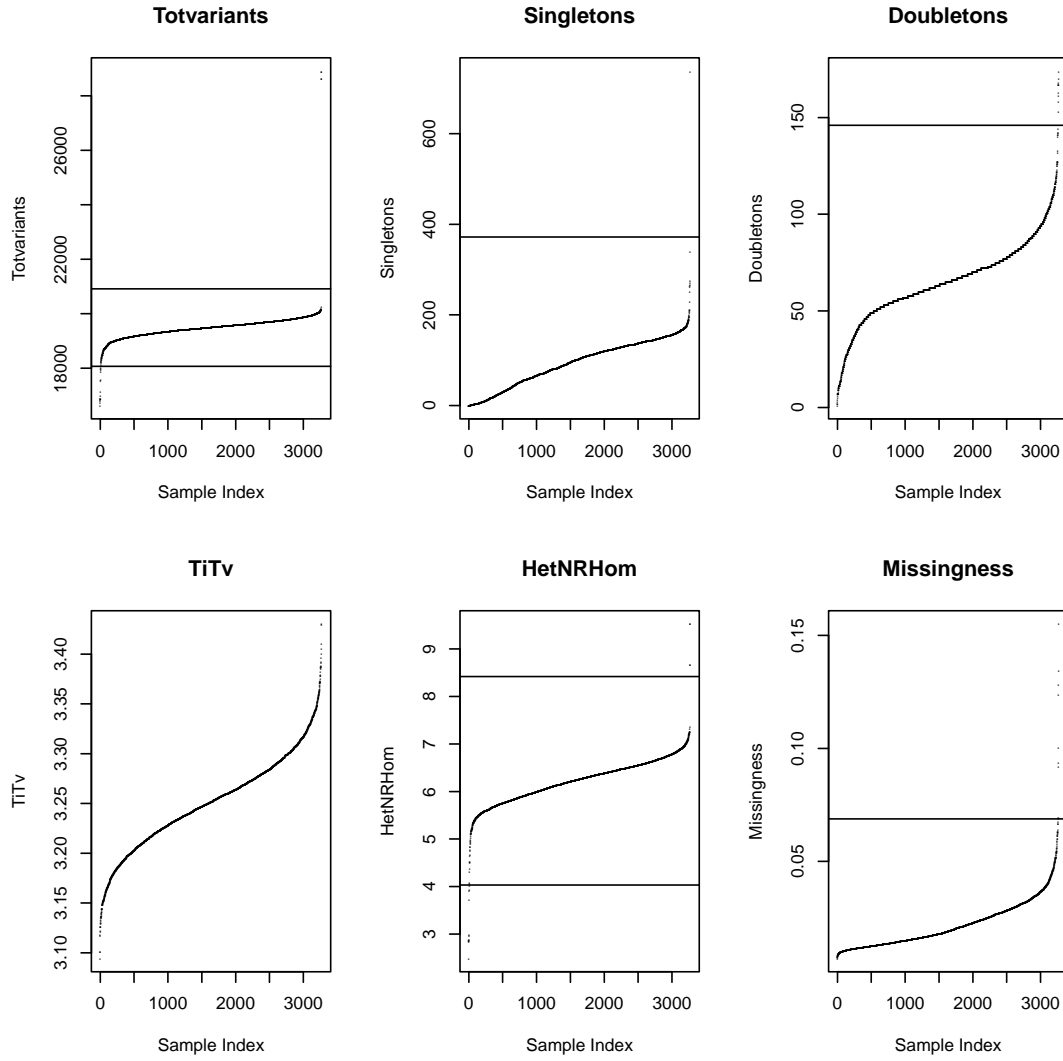

**Supplemental Figure 2. Principal components (PCs) of ancestry.**

A. PCs of Jackson Heart Study samples with HapMap samples

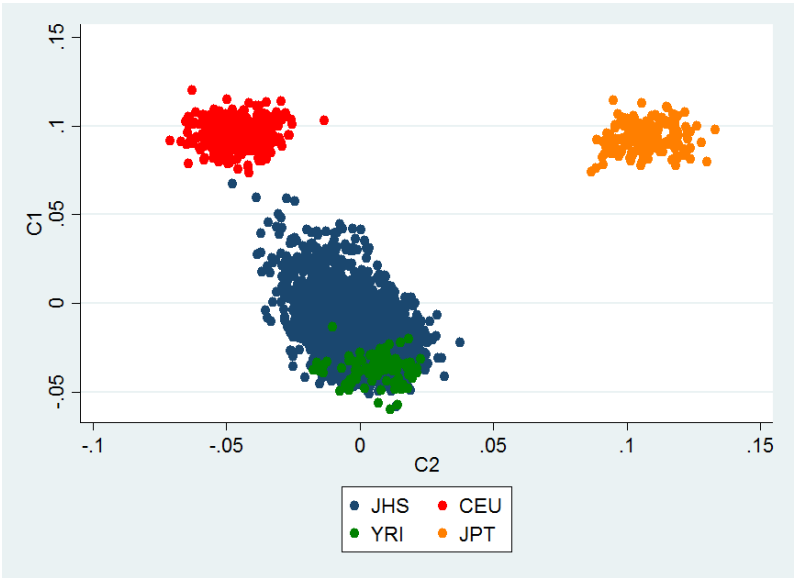

B. PCs of Jackson Heart Study samples only.

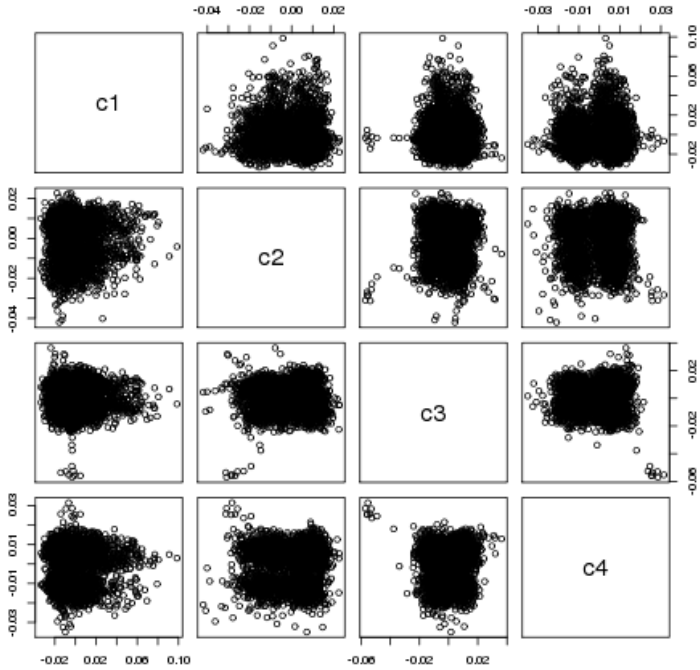

**Supplemental Figure 3. Distribution of LDL-C in *PCSK9* null carriers and non-carriers.**

Distribution of LDL-C in individuals carrying a null mutation in *PCSK9* (n=77; purple) is lowered compared to individuals that do not carry a null mutation in *PCSK9* (n=3,143; pink). Individuals carrying two null mutations in *PCSK9* (n=3; green lines) have lower LDL-C compared with individuals carrying a single null mutation in *PCSK9* (p=0.044 assessed with a Wilcoxon rank sum test).

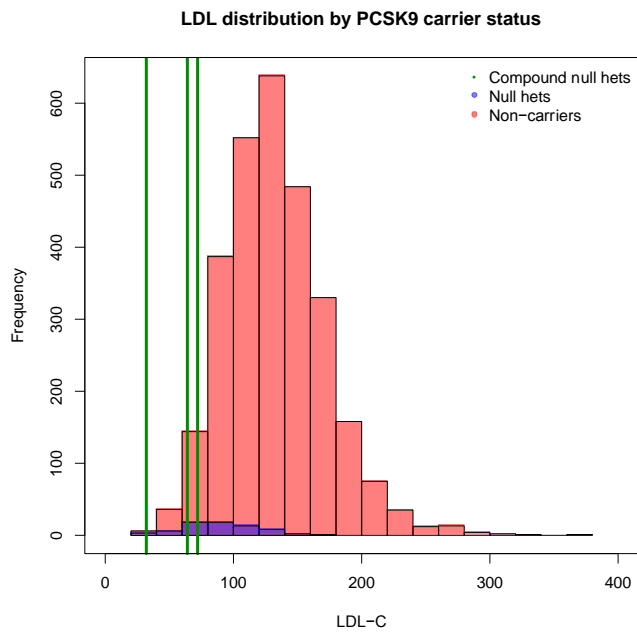

Supplement: NIHMS803853-supplement-001410_-_Supplemental_Material.pdf [file NIHMS803853-supplement-001410_-_Supplemental_Material.pdf]
